1 Characterization of presumptive vancomycin-resistant enterococci recovered during  
2 infection control surveillance in Dallas, Texas

3  
4 Sara Ping<sup>a</sup>, Nancy Mayorga-Reyes<sup>a</sup>, Valerie J. Price<sup>a</sup>, Michelle Onuoha<sup>a</sup>, Pooja  
5 Bhardwaj<sup>a</sup>, Marinelle Rodrigues<sup>a</sup>, Jordan Owen<sup>a</sup>, Dennise Palacios Araya<sup>a</sup>, Ronda L.  
6 Akins<sup>b</sup>, and Kelli L. Palmer<sup>a#</sup>

7  
8 Department of Biological Sciences, The University of Texas at Dallas, Richardson,  
9 Texas, USA<sup>a</sup>

10 Methodist Charlton Medical Center, Dallas, Texas, USA<sup>b</sup>

11  
12 Running head: Analysis of vancomycin-resistant enterococci from Dallas, Texas

13  
14  
15 #Address correspondence to [kelli.palmer@utdallas.edu](mailto:kelli.palmer@utdallas.edu) (KLP)

16 **Abstract**

17

18 *Enterococcus faecalis* and *E. faecium* are Gram-positive bacteria that normally inhabit the human  
19 gastrointestinal tract. They are also opportunistic pathogens and can cause nosocomial infection  
20 outbreaks. To prevent the spread of nosocomial infections, hospitals may rely on screening  
21 methods to identify patients colonized with multidrug-resistant organisms including vancomycin-  
22 resistant enterococci (VRE). Spectra VRE agar (Remel) contains vancomycin and other medium  
23 components that select for VRE and phenotypically differentiate between *faecalis* and *faecium*  
24 species by colony color. We obtained 66 de-identified rectal swab cultures on Spectra VRE agar  
25 that were obtained during routine patient admission surveillance at a Dallas, Texas hospital. We  
26 analyzed 90 presumptive VRE from 61 of the Spectra VRE agar cultures using molecular and  
27 culture methods. Using *ddl* typing, 55 were found to be *E. faecium* and 32 were found to be *E.*  
28 *faecalis*. While most of the *E. faecium* were positive for the *vanA* gene by PCR (52 of 55 strains),  
29 few of the *E. faecalis* were positive for either *vanA* or *vanB* (5 of 32 strains). The 27 *E. faecalis*  
30 *vanA*- and *vanB*-negative strains could not be recultured on Spectra VRE agar. Overall, we found  
31 that Spectra VRE agar performed robustly for the identification of vancomycin-resistant *E.*  
32 *faecium*, but presumptive false positives were obtained for vancomycin-resistant *E. faecalis*.

33

34

## 35 **Introduction**

36  
37 Vancomycin resistant enterococci (VRE), typically *Enterococcus faecium* and less commonly *E.*  
38 *faecalis*, are hospital-associated pathogens of significant public health concern. VRE are among  
39 the antibiotic-resistant pathogens identified by the United States Centers for Disease Control and  
40 Prevention as being serious threats to public health (1).

41  
42 It is important to distinguish VRE from vancomycin-susceptible enterococci (VSE). VSE are  
43 normal colonizers of the human gastrointestinal tract (2). Like VRE, VSE can opportunistically  
44 cause infections, but more treatment options are available for infections with VSE. There are a  
45 number of surveillance methods that can be employed to identify patients colonized with VRE and  
46 to guide infection control practices in clinical settings. These methods typically involve culture-  
47 based screening of rectal swabs or fecal material on media containing vancomycin. One such  
48 medium is Spectra VRE agar (Remel). Spectra VRE agar contains 6 µg/mL vancomycin and  
49 proprietary chromogens that allow distinction between *E. faecium* and *E. faecalis* based on colony  
50 color.

51  
52 In this study, we analyzed presumptive VRE obtained during routine patient admission screening  
53 for multidrug-resistant organisms (MDRO) at a Dallas, Texas, hospital. Our goals were to validate  
54 the isolates obtained from Spectra VRE agar cultures and to develop a strain collection to be used  
55 in future studies of enterococcal biology.

## 56 57 **Materials and Methods**

58  
59 **Culture methods and molecular biology procedures.** Unless otherwise stated, enterococci  
60 were cultured at 37°C in brain heart infusion (BHI) broth or on BHI agar. Spectra VRE agar plates

61 for independent testing of presumptive VRE isolates were purchased from Fisher Scientific.  
62 Genomic DNA was isolated using the DNeasy Blood and Tissue kit (Qiagen). Taq polymerase  
63 (New England Biolabs) was used for PCR. PCR products used for sequencing analysis were  
64 purified using the GeneJET PCR Purification kit (Thermo Fisher Scientific). Sequencing of PCR  
65 products was performed at the Massachusetts General Hospital CCBI Core facility.

66  
67 **Collection of presumptive VRE.** Presumptive VRE were collected at the Methodist Dallas Health  
68 System during routine MDRO surveillance. Surveillance culture screening was performed on  
69 patients admitted with at least one of these risk factors: hospitalization for  $\geq 2$  consecutive nights  
70 in the preceding 30 days, transferred from another medical facility, residence in a nursing home  
71 or extended/long term care facility, or the presence of decubitus ulcer or a draining wound. We  
72 obtained rectal swab cultures that were performed as a part of these routine admission  
73 surveillance procedures (UT-Dallas protocol number MR 14-448 and Methodist Health System  
74 protocol number P15MHS.0001A). The rectal swabs were plated on Spectra VRE agar. Instead  
75 of disposal after clinical surveillance was complete, Spectra VRE plates with visible growth were  
76 coded numerically, deidentified, and transferred to the University of Texas at Dallas for further  
77 analysis of presumptive VRE. One plate corresponded to one unique patient. Spectra VRE plates  
78 were collected from August 2015 through October 2015. At least one colony from each Spectra  
79 VRE plate was sub-cultured into BHI broth, incubated overnight, and stored at  $-80^{\circ}\text{C}$  with 25%  
80 glycerol. If multiple colony phenotypes were observed from one Spectra VRE plate (for example,  
81 multiple different colony colors or morphologies), representative colonies of each phenotype were  
82 picked.

83  
84 **Species determination and van typing.** Primers used in this study are shown in **Table S1**. *ddl*  
85 primer sets used to identify *E. faecalis* and *E. faecium*, and the type of vancomycin resistance  
86 (*vanA* or *vanB*), were previously reported (3, 4). In the event that an isolate was neither *E. faecium*

87 or *E. faecalis* by *ddl* PCR, the 16S rRNA gene was amplified using universal primers 8S and  
88 1492R (5) and sequenced. At least 1300 non-ambiguous bases were used as query against the  
89 NCBI nr/nt database by megaBLAST. Hits with 100% query coverage and the highest percent  
90 sequence identity are reported. Boiled colonies were used as a template for PCR where possible;  
91 for some isolates, purified genomic DNA was used as a template.

92

93 **Vancomycin MIC.** Vancomycin susceptibility was assessed for a subset of isolates using broth  
94 microdilution. Twofold serial dilutions of drug were made with BHI broth in a 96-well microtiter  
95 plate. An overnight culture was diluted to an OD<sub>600nm</sub> of 0.001, and 5 µL were used to inoculate  
96 the wells of the plate. The MIC was recorded after 24 hours incubation at 37°C. Broth microdilution  
97 experiments were performed twice independently for each strain.

98

99 **Spectra VRE growth test.** Select stocked isolates of interest were inoculated onto Spectra VRE  
100 agar to confirm whether growth occurred. Overnight cultures in BHI broth were diluted to an  
101 OD<sub>600nm</sub> of 0.005 in 1-3 mL fresh BHI broth, then incubated at 37°C for 3.5 hours. 100 µL culture  
102 was spread plated onto Spectra VRE agar; for some isolates, 50 µL culture was spread over one  
103 half of the plate. A subset of strains were also inoculated on BHI agar supplemented with 6 µg/mL  
104 vancomycin. Plates were incubated for 24 hours at 37°C. *E. faecium* 1,231,410, a VanA-type VRE  
105 (6) and *E. faecalis* V583, a VanB-Type VRE (7, 8), were included as positive controls, yielding  
106 purple and light blue lawns, respectively.

107

108 **MLST and CRISPR-Cas analysis of select *E. faecalis* strains.** The MLST database  
109 (<https://pubmlst.org/efaecalis/>) and sequencing of internal fragments of seven house-keeping  
110 genes were used as previously described (9) to determine the sequence type (ST) of 11 *E.*  
111 *faecalis* isolates. Novel STs were submitted to the database. PCR was used to screen 23 *E.*

112 *faecalis* isolates for the presence of three previously identified *E. faecalis* CRISPR loci (CRISPR1-  
113 Cas, CRISPR2, and CRISPR3-Cas) (10, 11). Specifically, previously reported primer sets were  
114 used to screen for the presence of CRISPR1 *cas9* and CRISPR3 *cas9* (10). Strains with negative  
115 *cas9* results were then confirmed to lack the entire CRISPR-Cas loci by using previously reported  
116 primer sets that anneal outside the conserved chromosomal locations where the loci occur (10).  
117 CRISPR2 arrays were amplified and sequenced as previously described (10, 12). CRISPR2  
118 spacer sequences were compared with a previously reported CRISPR2 spacer dictionary  
119 generated from 228 *E. faecalis* genomes (12).

120

## 121 **Results**

122

123 **Initial analysis of Spectra VRE cultures.** We obtained 66 Spectra VRE plates with visible  
124 bacterial growth, corresponding to 66 presumptive VRE-positive patients. Subsequently, 100  
125 colonies of interest were identified and stocked for further analysis (Table S2). Based on colony  
126 color, 33 were presumptive *E. faecalis* VRE (light blue color), 64 were presumptive *E. faecium*  
127 VRE (navy blue or purple), and 3 colonies had atypical color (white) (Table S2).

128

129 **Confirmation of species prediction.** Of the 100 stocked strains, 10 could not be revived from  
130 freezer stock (Table S2). Of these, 1 was a presumptive *E. faecalis* by colony color, and 9 were  
131 presumptive *E. faecium* by colony color. The inability to revive these isolates reduced our isolate  
132 number to 90 and our patient cohort size from 66 to 61.

133

134 Primer sets designed to amplify the *ddl* genes of *E. faecium* and *E. faecalis* (3, 4) were used to  
135 determine the species of the 90 presumptive VRE isolates. For strains where *ddl* PCR yielded  
136 negative results for both *E. faecalis* and *E. faecium* primer sets, the 16S rRNA gene was amplified  
137 and sequenced.

138

139 Of the 32 presumptive *E. faecalis* VRE that were recovered from freezer stock, 25 were confirmed  
140 to be *E. faecalis* by *ddl* PCR, and 7 were not confirmed by *E. faecalis ddl* PCR. Of these 7 strains,  
141 6 were found to be *E. faecium* by *ddl* PCR, and 1 was found to be a presumptive *E. raffinosus* or  
142 *E. gilvus* by 16S rRNA gene analysis (99.78% sequence identity). In total, 78% of the colonies  
143 predicted to be *E. faecalis* based on Spectra VRE colony color were confirmed to be *E. faecalis*  
144 using *ddl* typing (Table S2).

145

146 Of the 55 presumptive *E. faecium* VRE that were recovered from freezer stock, 47 were confirmed  
147 to be *E. faecium* by *ddl* PCR, 1 was a mixed culture of *E. faecium* and *E. faecalis*, and 7 were not  
148 confirmed by *E. faecium ddl* PCR. Of these, all 7 were found to be *E. faecalis* by *ddl* PCR. In total,  
149 85% of the colonies predicted to be *E. faecium* based on Spectra VRE colony color were  
150 confirmed to be *E. faecium* using *ddl* typing (Table S2).

151

152 Of the 3 atypical white colonies, two were found to be *E. faecium* by *ddl* PCR, and one was found  
153 to be *Staphylococcus epidermidis* by 16S rRNA gene analysis (99.85% sequence identity) (Table  
154 S2).

155

156 In summary, of the 90 presumptive VRE isolates analyzed using *ddl* typing, 55 were found to be  
157 *E. faecium*, 32 were found to be *E. faecalis*, 2 were found to be neither, and one was a mixed  
158 culture.

159

#### 160 **Determination of vancomycin resistance type and re-testing for growth on Spectra VRE.**

161 Vancomycin resistance in enterococci is conferred by the synthesis of peptidoglycan precursors  
162 for which vancomycin has reduced binding affinity (13). Vancomycin resistance loci can be  
163 classified by the gene sequences for the D-alanine-D-lactate ligases, VanA and VanB, which are

164 the most prevalent vancomycin resistance types for hospital-associated VRE (14). We screened  
165 our isolates for the presence of *vanA* and *vanB* using previously reported primer sets (3, 4).

166  
167 Of the 55 *ddl*-confirmed *E. faecium*, 52 were positive for *vanA* and negative for *vanB*, and 3 were  
168 negative for both *vanA* and *vanB* (Table S3). Broth microdilution with vancomycin was performed  
169 for 14 of the 52 *vanA*-positive isolates to confirm their vancomycin resistance, and their  
170 vancomycin MICs were all  $\geq 256$   $\mu\text{g/mL}$ , as expected. The 3 isolates that were negative for both  
171 *vanA* and *vanB* were assessed for growth on Spectra VRE agar, and they did not grow, indicating  
172 that the initial clinical cultures were false positives. Broth microdilution with vancomycin was  
173 performed for these three isolates. Two of the isolates had vancomycin MICs of 2  $\mu\text{g/mL}$ . One  
174 isolate (163-2) had a vancomycin MIC of 512  $\mu\text{g/mL}$ , despite being negative by PCR for both  
175 *vanA* and *vanB* and failing to be re-cultured on Spectra VRE. Further investigation is required to  
176 determine the genetic basis for the phenotypes observed for this strain.

177  
178 Of the 32 *ddl*-confirmed *E. faecalis*, 4 were positive for *vanA* and negative for *vanB*, 1 was positive  
179 for *vanB* and negative for *vanA*, and the other 27 were negative for both *vanA* and *vanB* (Table  
180 S4). All *ddl*-confirmed *E. faecalis* were assessed for growth on Spectra VRE agar. Only the 5  
181 *vanA*- or *vanB*-positive strains grew robustly on Spectra VRE. For the other 27 strains, no growth  
182 was observed, except that a single light blue colony was observed for each of isolates 107-2 and  
183 110. Nine of these 27 *vanA*- and *vanB*-negative strains were also assessed for growth on BHI  
184 agar supplemented with 6  $\mu\text{g/mL}$  vancomycin, and they failed to grow. Overall, these results  
185 suggest that the initial clinical cultures for 27 of the 32 *E. faecalis* strains were false positives on  
186 Spectra VRE. To follow up on these results, broth microdilution with vancomycin was performed  
187 for 5 of these isolates, and their vancomycin MICs were 2-4  $\mu\text{g/mL}$ . Additional investigation is



188 required to determine the mechanism for incongruence between initial clinical culture on Spectra  
189 VRE and subsequent molecular typing and Spectra VRE re-culture results.

190  
191 Finally, the presumptive *E. raffinosus*/*E. gilvus* isolate was found to be *vanA*-positive and *vanB*-  
192 negative (Table S5). This isolate was assessed for growth on Spectra VRE, and it grew, forming  
193 light purple colonies. The broth microdilution vancomycin MIC for this strain is 128 µg/mL.

194  
195 **MLST and CRISPR2 analysis of select *E. faecalis* isolates.** We used MLST (9) and a  
196 previously published CRISPR-based typing method for *E. faecalis* (12) to assess phylogenetic  
197 relationships among a subset of the *E. faecalis* isolates. MLST uses sequence variation in 7  
198 housekeeping loci to characterize phylogenetic relationships between strains. CRISPRs are  
199 hypervariable loci consisting of short (36 base pair) repeats interspersed by short (30 base pair)  
200 spacer sequences in *E. faecalis* (10, 11). Comparative analysis of CRISPR spacer sequences is  
201 an alternative method to MLST to analyze relationships between strains (15).

202  
203 The sequence type (ST) of 11 *E. faecalis* isolates was determined, including 2 *vanA*-positive  
204 isolates and the single *vanB*-positive isolate. Eight STs were identified (Table 1). Five of the  
205 eleven isolates were novel STs (ST777, ST778, ST779), including the two *vanA* isolates (both  
206 ST779) and the *vanB* isolate (ST778). ST16 (2 isolates) and ST179 (one isolate) are single-locus  
207 variants of each other. Otherwise, all strains varied at  $\geq 3$  of the 7 loci relative to each other.

208  
209 The CRISPR2 arrays of 23 *E. faecalis* isolates were amplified, sequenced, and analyzed (Table  
210 1). We compared the CRISPR2 spacer sequences obtained here with our previous analysis of  
211 CRISPR2 loci in 228 *E. faecalis* genomes, wherein spacers of unique sequence were assigned  
212 unique numerical identifiers (12). We identified 12 CRISPR2 types among the 23 isolates. Only 2  
213 of the 23 isolates analyzed here possessed novel spacer sequences relative to our previous study

214 (denoted as letters in Table 1). Eight of the 23 isolates, corresponding to 8 patients, had identical  
215 CRISPR2 loci of spacers 85-83-86-82.

216  
217 We also determined the occurrence of the previously identified CRISPR-Cas loci, CRISPR1-Cas  
218 and CRISPR3-Cas (10, 11), among the 23 *E. faecalis* analyzed for CRISPR2 typing (Table 1).  
219 Both of these systems can protect *E. faecalis* from the acquisition of mobile genetic elements that  
220 confer antibiotic resistance (16, 17). No isolates possessed CRISPR3-Cas. Two of the 23 isolates  
221 possessed CRISPR1-Cas (Table 1).

222  
223 Two *E. faecalis* isolates from patient number 142 were analyzed by both MLST and CRISPR2  
224 typing (Table 1). The isolates were of different STs and different CRISPR2 types, demonstrating  
225 co-colonization of the patient 142 gastrointestinal tract by genetically distinct *E. faecalis*.

226  
227 **Conclusions**

228  
229 We report the collection and initial analysis of presumptive VRE obtained from hospitalized  
230 patients in Dallas, Texas. Our short-term goal (this study) was to validate the isolates obtained  
231 from Spectra VRE agar cultures. Our long-term goal is to use genome sequencing approaches to  
232 study the phylogeny and antibiotic resistance of these isolates.

233  
234 We determined that most (52 of 55; 94.5%) of *ddl*-confirmed *E. faecium* from Spectra VRE rectal  
235 swab cultures were *vanA*-positive, while most (27 of 32; 84%) of *ddl*-confirmed *E. faecalis* were  
236 negative for both *vanA* and *vanB*. All of the *vanA*- and *vanB*-negative strains failed to be recultured  
237 on Spectra VRE, with the exceptions of a single colony observed for each of two *E. faecalis*  
238 strains. Conversely, control VRE strains and 6 *vanA*- and *vanB*-positive rectal swab strains were  
239 robustly cultured on Spectra VRE, as expected. There were key differences between use of the

240 Spectra VRE agar in the clinical microbiology versus research labs. First, different batches of the  
241 agar were used. Second, the inoculation methods differed. In the clinical microbiology lab, rectal  
242 swabs (mixed cultures) were used to inoculate the agar, while in the research lab, high density  
243 pure cultures were spread on the agar. That said, of the 30 total isolates that failed to be recultured  
244 on Spectra VRE, we determined vancomycin MIC for 8 of them, and 7 had vancomycin MICs of  
245 2-4  $\mu\text{g}/\text{mL}$ . The concentration of vancomycin in Spectra VRE is 6  $\mu\text{g}/\text{mL}$ , therefore it is expected  
246 that these strains should not grow on this medium. A final point is that in the clinical microbiology  
247 lab, the results of the entire agar culture are used to guide surveillance decisions, while in our  
248 research study, we selected only 1-3 single colonies per plate for analysis. Therefore, we cannot  
249 comment on whether the total Spectra VRE rectal swab culture was comprised of vancomycin-  
250 sensitive strains, or merely certain colonies. That said, we are not the first to observe false  
251 positives using Spectra VRE agar, particularly for *E. faecalis*. In a previous study, patient age was  
252 significantly correlated with false positive vancomycin-resistant *E. faecalis* results (18). For our  
253 strain collection, genome sequencing and more phenotypic assessments of vancomycin  
254 susceptibility and heterogeneity will be used in future studies to characterize these isolates  
255 further.

256  
257 In conclusion, we present a collection of fecal enterococcal isolates from the Dallas, Texas, area.  
258 Most VRE identified via Spectra VRE agar were confirmed to be VanA-type *E. faecium*.

259

## 260 **Acknowledgements**

261 This project was supported by UT-Dallas start-up funds and R01AI116610 to K.P; a Louis Stokes  
262 Alliance for Minority Participation (LSAMP) scholarship to M.O., and the UT Dallas – Mexico  
263 Research Summer Program to N.M. We gratefully acknowledge Dr. Joslyn Pribble and the  
264 Microbiology lab at Methodist Health System, without whom this work would not be possible.

265

266 **References**

267

268 1. Centers for Disease Control and Prevention. Antibiotic Resistance Threats in the United  
269 States, 2019.

270 2. Lebreton F, Willems RJL, Gilmore MS. Enterococcus Diversity, Origins in Nature, and  
271 Gut Colonization. In: Gilmore MS, Clewell DB, Ike Y, Shankar N, editors. Enterococci: From  
272 Commensals to Leading Causes of Drug Resistant Infection. Boston, Massachusetts, USA.  
273 2014.

274 3. Dutka-Malen S, Evers S, Courvalin P. Detection of glycopeptide resistance genotypes  
275 and identification to the species level of clinically relevant enterococci by PCR. Journal of  
276 Clinical Microbiology. 1995;33(5):1434.

277 4. Dutka-Malen S, Evers S, Courvalin P. Detection of glycopeptide resistance genotypes  
278 and identification to the species level of clinically relevant enterococci by PCR. Journal of  
279 Clinical Microbiology. 1995;33(1):24-7.

280 5. Turner S, Pryer KM, Miao VP, Palmer JD. Investigating deep phylogenetic relationships  
281 among cyanobacteria and plastids by small subunit rRNA sequence analysis. J Eukaryot  
282 Microbiol. 1999;46(4):327-38.

283 6. Palmer KL, Godfrey P, Griggs A, Kos VN, Zucker J, Desjardins C, et al. Comparative  
284 genomics of enterococci: variation in *Enterococcus faecalis*, clade structure in *E. faecium*, and  
285 defining characteristics of *E. gallinarum* and *E. casseliflavus*. MBio. 2012;3(1):e00318-11.

286 7. Sahm DF, Kissinger J, Gilmore MS, Murray PR, Mulder R, Solliday J, et al. In vitro  
287 susceptibility studies of vancomycin-resistant *Enterococcus faecalis*. Antimicrobial Agents and  
288 Chemotherapy. 1989;33(9):1588-91.

289 8. Paulsen IT, Banerjee L, Myers GS, Nelson KE, Seshadri R, Read TD, et al. Role of  
290 mobile DNA in the evolution of vancomycin-resistant *Enterococcus faecalis*. Science.  
291 2003;299(5615):2071-4.

- 292 9. Ruiz-Garbajosa P, Bonten MJ, Robinson DA, Top J, Nallapareddy SR, Torres C, et al.  
293 Multilocus sequence typing scheme for *Enterococcus faecalis* reveals hospital-adapted genetic  
294 complexes in a background of high rates of recombination. *Journal of Clinical Microbiology*.  
295 2006;44(6):2220-8.
- 296 10. Palmer KL, Gilmore MS. Multidrug-resistant enterococci lack CRISPR-cas. *MBio*.  
297 2010;1(4): e00227-10.
- 298 11. Bourgogne A, Garsin DA, Qin X, Singh KV, Sillanpaa J, Yerrapragada S, et al. Large  
299 scale variation in *Enterococcus faecalis* illustrated by the genome analysis of strain OG1RF.  
300 *Genome Biology*. 2008;9(7):R110.
- 301 12. Hullahalli K, Rodrigues M, Schmidt BD, Li X, Bhardwaj P, Palmer KL. Comparative  
302 Analysis of the Orphan CRISPR2 Locus in 242 *Enterococcus faecalis* Strains. *PloS One*.  
303 2015;10(9):e0138890.
- 304 13. Courvalin P. Vancomycin resistance in gram-positive cocci. *Clinical Infectious Diseases*.  
305 2006;42 Suppl 1:S25-34.
- 306 14. Kristich CJ, Rice LB, Arias CA. Enterococcal Infection-Treatment and Antibiotic  
307 Resistance. In: Gilmore MS, Clewell DB, Ike Y, Shankar N, editors. *Enterococci: From*  
308 *Commensals to Leading Causes of Drug Resistant Infection*. Boston, Massachusetts, USA.  
309 2014.
- 310 15. Barrangou R, Dudley EG. CRISPR-Based Typing and Next-Generation Tracking  
311 Technologies. *Annual Review of Food Science and Technology*. 2016;7:395-411.
- 312 16. Price VJ, Huo W, Sharifi A, Palmer KL. CRISPR-Cas and Restriction-Modification Act  
313 Additively against Conjugative Antibiotic Resistance Plasmid Transfer in *Enterococcus faecalis*.  
314 *mSphere*. 2016;1(3):e00064-16.
- 315 17. Hullahalli K, Rodrigues M, Palmer KL. Exploiting CRISPR-Cas to manipulate  
316 *Enterococcus faecalis* populations. *Elife*. 2017;6:e26664.

317 18. Gander RM, Cavuoti D, Alatoon A, Southern P, Jr., Grant D, Salinas K, et al. Pseudo-  
318 outbreak of vancomycin-resistant-*Enterococcus* (VRE) Colonization in a neonatal intensive care  
319 unit using Spectra VRE surveillance medium. *Journal of Clinical Microbiology*. 2013;51(3):810-  
320 3.  
321  
322

323 **Table 1. MLST and CRISPR typing results.**  
324

| Isolate ID | <i>vanA/B</i> <sup>a</sup> | ST <sup>b</sup> | CRISPR2 <sup>c</sup>          | CRISPR-Cas <sup>d</sup> |
|------------|----------------------------|-----------------|-------------------------------|-------------------------|
| 2-1        | ---                        | 59              | 91-110-108-109-107            | Not present             |
| 43-2       | ---                        | 64              | 85-83-86-82                   | Not present             |
| 59         | <i>vanA</i>                | 779             | 92                            | Not present             |
| 80         | ---                        | ND              | 85-83-86-82                   | Not present             |
| 81         | ---                        | ND              | 12-67                         | Not present             |
| 94-1       | ---                        | 179             | 85-83-86-82                   | Not present             |
| 101-2      | ---                        | 6               | 12-67                         | Not present             |
| 106        | ---                        | ND              | 85-83-86-82                   | Not present             |
| 107-2      | ---                        | ND              | 1-5-38-70                     | CRISPR1-Cas             |
| 110        | ---                        | ND              | 12-171(SNP)-170-89-169        | Not present             |
| 119-1      | ---                        | 16              | 12-29-28-27-26-25-24-23-22-21 | CRISPR1-Cas             |
| 122-2      | <i>vanA</i>                | ND              | 12-67                         | Not present             |
| 125-1      | ---                        | ND              | 85-83-86-82                   | Not present             |
| 127-1      | ---                        | ND              | 85-83-86-82                   | Not present             |
| 131-1      | <i>vanA</i>                | 779             | 92                            | Not present             |
| 132        | ---                        | ND              | 1-5-4-3-2                     | Not present             |
| 133-1      | ---                        | 777             | 85-a-b-c-d-e-f-g-h            | Not present             |
| 141-2      | <i>vanB</i>                | 778             | 1-5-4-3-2                     | Not present             |
| 142-1      | ---                        | 777             | 85-i-b-j-e-f-g-h              | Not present             |
| 142-2      | ---                        | 16              | 12-29-28-27-26-25-24-23-22-21 | Not present             |
| 143-1      | ---                        | ND              | 85-83-86-82                   | Not present             |
| 153-1      | ---                        | ND              | 92                            | Not present             |
| 152        | ---                        | ND              | 85-83-86-82                   | Not present             |

325 <sup>a</sup>---, negative results for *vanA* and *vanB* PCR reactions.

326 <sup>b</sup>ND, not determined.

327 <sup>c</sup>Numbering scheme is from Hullahalli, et al, 2015. Letters indicate novel CRISPR spacers.

328 SNP, differs from spacer sequence 171 by a single nucleotide polymorphism.

329 <sup>d</sup>The presence or absence of CRISPR1-Cas and CRISPR3-Cas was evaluated for all isolates  
330 shown.

331

**Table S1. Primers used in this study.** See materials and methods section for references for primers.

| <b>Primer name</b>                  | <b>Sequence (5'--&gt;3')<sup>a</sup></b> |
|-------------------------------------|------------------------------------------|
| <b>Vancomycin resistance typing</b> |                                          |
| <i>vanA</i> F                       | GGGAAAACGACAATTGC                        |
| <i>vanA</i> R                       | GTACAATGCGGCCGTTA                        |
| <i>vanB</i> F                       | ATGGGAAGCCGATAGTC                        |
| <i>vanB</i> R                       | GATTCGTTCTCGACC                          |
| <b>Species determination</b>        |                                          |
| <i>E. faecium</i> <i>ddl</i> F      | TAGAGACATTGAATATGCC                      |
| <i>E. faecium</i> <i>ddl</i> R      | CATCGTGTAAAGCTAACTTC                     |
| <i>E. faecalis</i> <i>ddl</i> F     | ATCAAGTACAGTTAGTCTT                      |
| <i>E. faecalis</i> <i>ddl</i> R     | ACGATTCAAAGCTAACTG                       |
| 16S rRNA 8F                         | AGAGTTTGATCCTGGCTCAG                     |
| 16S rRNA 1492R                      | GGTACCTTGTTACGACTT                       |
| <b>CRISPR-Cas analysis</b>          |                                          |
| CRISPR2 seq F                       | CTGGCTCGCTGTTACAGCT                      |
| CRISPR2 seq R                       | GCCAATGTTACAATATCAAACA                   |
| CRISPR1-Cas flank F                 | GCGATGTTAGCTGATACAAC                     |
| CRISPR1-Cas flank R                 | CGAATATGCCTGTGGTGAAA                     |
| CRISPR1-Cas <i>cas9</i> F           | CAGAAGACTATCAGTTGGTG                     |
| CRISPR1-Cas <i>cas9</i> R           | CCTTCTAAATCTTCTTCATAG                    |
| CRISPR3-Cas flank F                 | GATCACTAGGTTTCAGTTATTTT                  |
| CRISPR3-Cas flank R                 | CATCGATTCAATTCTCCTCAA                    |
| CRISPR3-Cas <i>cas9</i> F           | GCTGAATCTGTGAAGTTACTC                    |
| CRISPR3-Cas <i>cas9</i> R           | CTGTTTTGTTACCGTTGGAT                     |
| <b><i>E. faecalis</i> MLST</b>      |                                          |
| <i>gdh</i> -1                       | GGCGCACTAAAAGATATGGT                     |
| <i>gdh</i> -2                       | CCAAGATTGGGCAACTTCGTCCCA                 |
| <i>gyd</i> -1                       | CAAAGTCTTAGCTCCAATGGC                    |
| <i>gyd</i> -2                       | CATTCGTTGTCATACCAAGC                     |
| <i>pstS</i> -1                      | CGGAACAGGACTTTTCGC                       |
| <i>pstS</i> -2                      | ATTTACATCACGTTCTACTTGC                   |
| <i>gki</i> -1                       | GATTTTGTGGGAATTGGTATGG                   |
| <i>gki</i> -2                       | ACCATTAAAGCAAAATGATCGC                   |
| <i>aroE</i> -1                      | TGGAAAACCTTTACGGAGACAGC                  |
| <i>aroE</i> -2                      | GTCCTGTCCATTGTTCAAAGC                    |
| <i>xpt</i> -1                       | AAAATGATGGCCGTGTATTAGG                   |
| <i>xpt</i> -2                       | AACGTCACCGTTCCTTCACTTA                   |
| <i>yiqL</i> -1                      | CAGCTTAAGTCAAGTAAGTGCCG                  |
| <i>yiqL</i> -2                      | GAATATCCCTTCTGCTTGTGCT                   |



**Table S2. *ddl* typing data for presumptive VRE obtained from Spectra VRE plates.**

Notes:

\* For PCR analysis, an empty cell indicates a negative result for the PCR reaction.

NT indicates Not Tested. n/a indicates that the PCR reaction was not performed because the strain could not be recovered from freezer stock.

| Patient ID # | Isolate ID # | Colony Color on Spectra VRE | Predicted species based on colony color | Correct prediction?    | PCR analysis*  |                |             |             | Isolate ID # |
|--------------|--------------|-----------------------------|-----------------------------------------|------------------------|----------------|----------------|-------------|-------------|--------------|
|              |              |                             |                                         |                        | <i>Efm-ddl</i> | <i>Efs-ddl</i> | <i>vanA</i> | <i>vanB</i> |              |
| 1            | 1            | navy blue                   | <i>E. faecium</i>                       | yes                    | +              |                | +           |             | 1            |
| 2            | 2-1          | light blue                  | <i>E. faecalis</i>                      | yes                    |                | +              |             |             | 2-1          |
|              | 2-2          | light blue                  | <i>E. faecalis</i>                      | yes                    |                | +              |             |             | 2-2          |
|              | 2-3          | navy blue                   | <i>E. faecium</i>                       | no                     |                | +              |             |             | 2-3          |
| 5            | 5            | navy blue                   | <i>E. faecium</i>                       | yes                    | +              |                | +           |             | 5            |
| 7            | 7            | purple                      | <i>E. faecium</i>                       | yes                    | +              |                | +           |             | 7            |
| 9            | 9-1          | purple                      | <i>E. faecium</i>                       | yes                    | +              |                | +           |             | 9-1          |
|              | 9-2          | navy blue                   | <i>E. faecium</i>                       | yes                    | +              |                | +           |             | 9-2          |
| 16           | 16-1         | navy blue                   | <i>E. faecium</i>                       | yes                    | +              |                | +           |             | 16-1         |
|              | 16-2         | light blue                  | <i>E. faecalis</i>                      | no                     | +              |                | +           |             | 16-2         |
| 17           | 17-1         | navy blue                   | <i>E. faecium</i>                       | yes                    | +              |                | +           |             | 17-1         |
|              | 17-2         | white                       | ---                                     | no                     | +              |                | +           |             | 17-2         |
| 20           | 20           | navy blue                   | <i>E. faecium</i>                       | yes                    | +              |                | +           |             | 20           |
| 42           | 42           | navy blue                   | <i>E. faecium</i>                       | yes                    | +              |                | +           |             | 42           |
| 43           | 43-1         | navy blue                   | <i>E. faecium</i>                       | yes                    | +              |                | +           |             | 43-1         |
|              | 43-2         | light blue                  | <i>E. faecalis</i>                      | yes                    |                | +              |             |             | 43-2         |
| 51           | 51-1         | navy blue                   | <i>E. faecium</i>                       | yes                    | +              |                | +           |             | 51-1         |
|              | 51-3         | light blue                  | <i>E. faecalis</i>                      | no                     | +              |                | +           |             | 51-3         |
|              | 51-4         | purple                      | <i>E. faecium</i>                       | yes                    | +              |                | +           |             | 51-4         |
| 52           | 52           | navy blue                   | <i>E. faecium</i>                       | yes                    | +              |                | +           |             | 52           |
| 53           | 53-1         | purple                      | <i>E. faecium</i>                       | yes                    | +              |                | +           |             | 53-1         |
|              | 53-2         | purple (small color)        | <i>E. faecium</i>                       | yes                    | +              |                | +           |             | 53-2         |
| 55           | 55           | navy blue                   | <i>E. faecium</i>                       | yes                    | +              |                | +           |             | 55           |
| 57           | 57           | navy blue                   | <i>E. faecium</i>                       | yes                    | +              |                | +           |             | 57           |
| 59           | 59           | light blue                  | <i>E. faecalis</i>                      | yes                    |                | +              | +           |             | 59           |
| 60           | 60           | navy blue                   | <i>E. faecium</i>                       | mixed culture          | +              | +              | +           | +           | 60           |
| 66           | 66           | navy blue                   | <i>E. faecium</i>                       | yes                    | +              |                | +           |             | 66           |
| 70           | 70           | purple                      | <i>E. faecium</i>                       | yes                    | +              |                |             |             | 70           |
| 71           | 71-1         | navy blue                   | <i>E. faecium</i>                       | yes                    | +              |                | +           |             | 71-1         |
|              | 71-2         | purple                      | <i>E. faecium</i>                       | yes                    | +              |                | +           |             | 71-2         |
| 76           | 76           | navy blue                   | <i>E. faecium</i>                       | not revived from stock | n/a            | n/a            | n/a         | n/a         | 76           |
| 80           | 80           | light blue                  | <i>E. faecalis</i>                      | yes                    |                | +              |             |             | 80           |
| 81           | 81           | light blue                  | <i>E. faecalis</i>                      | yes                    |                | +              |             |             | 81           |
| 83           | 83           | navy blue                   | <i>E. faecium</i>                       | yes                    | +              |                | +           |             | 83           |
| 87           | 87-1         | navy blue                   | <i>E. faecium</i>                       | yes                    | +              |                | +           |             | 87-1         |
|              | 87-2         | purple                      | <i>E. faecium</i>                       | not revived from stock | n/a            | n/a            | n/a         | n/a         | 87-2         |
| 88           | 88           | navy blue                   | <i>E. faecium</i>                       | not revived from stock | n/a            | n/a            | n/a         | n/a         | 88           |
| 91           | 91           | navy blue                   | <i>E. faecium</i>                       | yes                    | +              |                | +           |             | 91           |
| 93           | 93-1         | navy blue                   | <i>E. faecium</i>                       | yes                    | +              |                | +           |             | 93-1         |
|              | 93-2         | white                       | ---                                     | no                     | +              |                | +           |             | 93-2         |
|              | 93-3         | light blue                  | <i>E. faecalis</i>                      | no                     | +              |                | +           |             | 93-3         |
| 94           | 94-1         | light blue                  | <i>E. faecalis</i>                      | yes                    |                | +              |             |             | 94-1         |
|              | 94-2         | big light blue              | <i>E. faecalis</i>                      | yes                    |                | +              |             |             | 94-2         |
| 97           | 97-1         | purple                      | <i>E. faecium</i>                       | yes                    | +              |                | +           |             | 97-1         |
|              | 97-2         | navy blue                   | <i>E. faecium</i>                       | yes                    | +              |                | +           |             | 97-2         |

|      |       |                    |                    |                                                           |     |     |     |     |       |
|------|-------|--------------------|--------------------|-----------------------------------------------------------|-----|-----|-----|-----|-------|
| 100  | 100-1 | navy blue          | <i>E. faecium</i>  | yes                                                       | +   |     | +   |     | 100-1 |
|      | 100-2 | light blue         | <i>E. faecalis</i> | no                                                        | +   |     | +   |     | 100-2 |
| 101  | 101-1 | large light blue   | <i>E. faecalis</i> | yes                                                       |     | +   |     |     | 101-1 |
|      | 101-2 | light blue         | <i>E. faecalis</i> | yes                                                       |     | +   |     |     | 101-2 |
| 103  | 103   | navy blue          | <i>E. faecium</i>  | yes                                                       | +   |     | +   |     | 103   |
| 106  | 106   | light blue         | <i>E. faecalis</i> | yes                                                       |     | +   |     |     | 106   |
| 107  | 107-1 | navy blue          | <i>E. faecium</i>  | yes                                                       | +   |     | +   |     | 107-1 |
|      | 107-2 | light blue         | <i>E. faecalis</i> | yes                                                       |     | +   |     |     | 107-2 |
| 110  | 110   | light blue         | <i>E. faecalis</i> | yes                                                       |     | +   |     |     | 110   |
| 111  | 111   | navy blue          | <i>E. faecium</i>  | yes                                                       | +   |     | +   |     | 111   |
| 113  | 113   | navy blue          | <i>E. faecium</i>  | yes                                                       | +   |     | +   |     | 113   |
| 119  | 119-1 | navy blue          | <i>E. faecium</i>  | no                                                        |     | +   |     |     | 119-1 |
|      | 119-2 | dark blue smudge   | <i>E. faecium</i>  | no                                                        |     | +   |     |     | 119-2 |
| 121  | 121   | navy blue          | <i>E. faecium</i>  | yes                                                       | +   |     | +   |     | 121   |
| 122  | 122-1 | navy blue          | <i>E. faecium</i>  | no                                                        |     | +   | +   |     | 122-1 |
|      | 122-2 | light blue         | <i>E. faecalis</i> | yes                                                       |     | +   | +   |     | 122-2 |
| 124  | 124-1 | navy blue          | <i>E. faecium</i>  | yes                                                       | +   |     | +   |     | 124-1 |
|      | 124-2 | purple             | <i>E. faecium</i>  | yes                                                       | +   |     | +   |     | 124-2 |
|      | 124-3 | light blue         | <i>E. faecalis</i> | no                                                        | +   |     | +   |     | 124-3 |
| 125  | 125-1 | light blue         | <i>E. faecalis</i> | yes                                                       |     | +   |     |     | 125-1 |
|      | 125-2 | small light blue   | <i>E. faecalis</i> | yes                                                       |     | +   |     |     | 125-2 |
| 127  | 127-1 | light blue         | <i>E. faecalis</i> | yes                                                       |     | +   |     |     | 127-1 |
|      | 127-2 | large light blue   | <i>E. faecalis</i> | yes                                                       |     | +   |     |     | 127-2 |
| 131  | 131-1 | light blue         | <i>E. faecalis</i> | yes                                                       |     | +   | +   |     | 131-1 |
|      | 131-2 | purple             | <i>E. faecium</i>  | yes                                                       | +   |     | +   |     | 131-2 |
| 132  | 132   | navy blue          | <i>E. faecium</i>  | no                                                        |     | +   |     |     | 132   |
| 133  | 133-1 | navy blue          | <i>E. faecium</i>  | no                                                        |     | +   |     |     | 133-1 |
|      | 133-2 | white              | ---                | no - <i>Staphylococcus epidermidis</i> by 16S rRNA        |     |     | NT  | NT  | 133-2 |
| 136  | 136-1 | navy blue          | <i>E. faecium</i>  | yes                                                       | +   |     | +   |     | 136-1 |
| 137  | 137   | navy blue          | <i>E. faecium</i>  | yes                                                       | +   |     | +   |     | 137   |
| 141  | 141-1 | light blue         | <i>E. faecalis</i> | not revived from stock                                    | n/a | n/a | n/a | n/a | 141-1 |
|      | 141-2 | navy blue          | <i>E. faecium</i>  | no                                                        |     | +   |     | +   | 141-2 |
| 142  | 142-1 | light blue         | <i>E. faecalis</i> | yes                                                       |     | +   |     |     | 142-1 |
|      | 142-2 | light blue (small) | <i>E. faecalis</i> | yes                                                       |     | +   |     |     | 142-2 |
| 143  | 143-1 | light blue         | <i>E. faecalis</i> | yes                                                       |     | +   |     |     | 143-1 |
|      | 143-2 | small light blue   | <i>E. faecalis</i> | yes                                                       |     | +   |     |     | 143-2 |
| 144  | 144-1 | navy blue          | <i>E. faecium</i>  | yes                                                       | +   |     | +   |     | 144-1 |
|      | 144-2 | purple             | <i>E. faecium</i>  | not revived from stock                                    | n/a | n/a | n/a | n/a | 144-2 |
| 145B | 145B  | navy blue          | <i>E. faecium</i>  | not revived from stock                                    | n/a | n/a | n/a | n/a | 145B  |
| 146  | 146   | light blue         | <i>E. faecalis</i> | no - <i>E. raffinosus</i> or <i>E. gilvus</i> by 16S rRNA |     |     | +   |     | 146   |
| 148  | 148   | navy blue          | <i>E. faecium</i>  | yes                                                       | +   |     | +   |     | 148   |
| 151  | 151-1 | purple             | <i>E. faecium</i>  | not revived from stock                                    | n/a | n/a | n/a | n/a | 151-1 |
|      | 151-2 | navy blue          | <i>E. faecium</i>  | not revived from stock                                    | n/a | n/a | n/a | n/a | 151-2 |
| 152  | 152   | light blue         | <i>E. faecalis</i> | yes                                                       |     | +   |     |     | 152   |
| 153  | 153-1 | light blue         | <i>E. faecalis</i> | yes                                                       |     | +   |     |     | 153-1 |
|      | 153-2 | purple             | <i>E. faecium</i>  | not revived from stock                                    | n/a | n/a | n/a | n/a | 153-2 |
| 154  | 154-1 | navy blue          | <i>E. faecium</i>  | yes                                                       | +   |     | +   |     | 154-1 |
|      | 154-2 | purple             | <i>E. faecium</i>  | not revived from stock                                    | n/a | n/a | n/a | n/a | 154-2 |
| 155  | 155   | navy blue          | <i>E. faecium</i>  | yes                                                       | +   |     | +   |     | 155   |
| 158  | 158   | navy blue          | <i>E. faecium</i>  | yes                                                       | +   |     | +   |     | 158   |
| 160  | 160   | navy blue          | <i>E. faecium</i>  | yes                                                       | +   |     | +   |     | 160   |
| 161  | 161   | navy blue          | <i>E. faecium</i>  | yes                                                       | +   |     | +   |     | 161   |
| 162  | 162   | navy blue          | <i>E. faecium</i>  | yes                                                       | +   |     | +   |     | 162   |
| 163  | 163-1 | navy blue          | <i>E. faecium</i>  | yes                                                       | +   |     |     |     | 163-1 |
|      | 163-2 | light blue         | <i>E. faecalis</i> | no                                                        | +   |     |     |     | 163-2 |

**Table S3. Data for *ddl*-confirmed *E. faecium* strains.**

Notes:

\* For PCR analysis, an empty cell indicates a negative result for the PCR reaction.

NT indicates Not Tested. n/a indicates that the PCR reaction was not performed because the strain could not be recovered from freezer stock.

\*\* For Spectra VRE re-testing, a blank cell indicates that the experiment was not performed for that strain.

\*\*\* Two trials of broth microdilution were performed. If different MIC values were obtained across the two trials, both values are stated.

A blank cell indicates that the experiment was not performed for that strain.

| Patient ID # | Isolate ID # | Colony Color on Spectra VRE | Predicted species based on colony color | Correct prediction? | PCR analysis*  |                |             |             | Re-test for growth on Spectra VRE agar** | Vancomycin MIC by broth microdilution*** | Isolate ID # |
|--------------|--------------|-----------------------------|-----------------------------------------|---------------------|----------------|----------------|-------------|-------------|------------------------------------------|------------------------------------------|--------------|
|              |              |                             |                                         |                     | <i>Efm-ddl</i> | <i>Efs-ddl</i> | <i>vanA</i> | <i>vanB</i> |                                          |                                          |              |
| 1            | 1            | navy blue                   | <i>E. faecium</i>                       | yes                 | +              |                | +           |             |                                          | 1024                                     | 1            |
| 5            | 5            | navy blue                   | <i>E. faecium</i>                       | yes                 | +              |                | +           |             |                                          | 2048                                     | 5            |
| 7            | 7            | purple                      | <i>E. faecium</i>                       | yes                 | +              |                | +           |             |                                          | 512                                      | 7            |
| 9            | 9-1          | purple                      | <i>E. faecium</i>                       | yes                 | +              |                | +           |             |                                          | 2048                                     | 9-1          |
|              | 9-2          | navy blue                   | <i>E. faecium</i>                       | yes                 | +              |                | +           |             |                                          |                                          | 9-2          |
| 16           | 16-1         | navy blue                   | <i>E. faecium</i>                       | yes                 | +              |                | +           |             |                                          | 1024                                     | 16-1         |
|              | 16-2         | light blue                  | <i>E. faecalis</i>                      | no                  | +              |                | +           |             |                                          |                                          | 16-2         |
| 17           | 17-1         | navy blue                   | <i>E. faecium</i>                       | yes                 | +              |                | +           |             |                                          | 512/1024                                 | 17-1         |
|              | 17-2         | white                       | ---                                     | no                  | +              |                | +           |             |                                          |                                          | 17-2         |
| 20           | 20           | navy blue                   | <i>E. faecium</i>                       | yes                 | +              |                | +           |             |                                          | 1024                                     | 20           |
| 42           | 42           | navy blue                   | <i>E. faecium</i>                       | yes                 | +              |                | +           |             |                                          | 1024                                     | 42           |
| 43           | 43-1         | navy blue                   | <i>E. faecium</i>                       | yes                 | +              |                | +           |             |                                          | 2048                                     | 43-1         |
| 51           | 51-1         | navy blue                   | <i>E. faecium</i>                       | yes                 | +              |                | +           |             |                                          | 2048                                     | 51-1         |
|              | 51-3         | light blue                  | <i>E. faecalis</i>                      | no                  | +              |                | +           |             |                                          | 1024                                     | 51-3         |
|              | 51-4         | purple                      | <i>E. faecium</i>                       | yes                 | +              |                | +           |             |                                          | 1024                                     | 51-4         |
| 52           | 52           | navy blue                   | <i>E. faecium</i>                       | yes                 | +              |                | +           |             |                                          | 2048                                     | 52           |
| 53           | 53-1         | purple                      | <i>E. faecium</i>                       | yes                 | +              |                | +           |             |                                          | 256                                      | 53-1         |
|              | 53-2         | purple (small color)        | <i>E. faecium</i>                       | yes                 | +              |                | +           |             |                                          |                                          | 53-2         |
| 55           | 55           | navy blue                   | <i>E. faecium</i>                       | yes                 | +              |                | +           |             |                                          |                                          | 55           |
| 57           | 57           | navy blue                   | <i>E. faecium</i>                       | yes                 | +              |                | +           |             |                                          |                                          | 57           |
| 66           | 66           | navy blue                   | <i>E. faecium</i>                       | yes                 | +              |                | +           |             |                                          |                                          | 66           |
| 70           | 70           | purple                      | <i>E. faecium</i>                       | yes                 | +              |                |             | No growth   | 2                                        |                                          | 70           |
| 71           | 71-1         | navy blue                   | <i>E. faecium</i>                       | yes                 | +              |                | +           |             |                                          |                                          | 71-1         |
|              | 71-2         | purple                      | <i>E. faecium</i>                       | yes                 | +              |                | +           |             |                                          |                                          | 71-2         |
| 83           | 83           | navy blue                   | <i>E. faecium</i>                       | yes                 | +              |                | +           |             |                                          |                                          | 83           |
| 87           | 87-1         | navy blue                   | <i>E. faecium</i>                       | yes                 | +              |                | +           |             |                                          |                                          | 87-1         |
| 91           | 91           | navy blue                   | <i>E. faecium</i>                       | yes                 | +              |                | +           |             |                                          |                                          | 91           |
| 93           | 93-1         | navy blue                   | <i>E. faecium</i>                       | yes                 | +              |                | +           |             |                                          |                                          | 93-1         |
|              | 93-2         | white                       | ---                                     | no                  | +              |                | +           |             |                                          |                                          | 93-2         |
|              | 93-3         | light blue                  | <i>E. faecalis</i>                      | no                  | +              |                | +           |             |                                          |                                          | 93-3         |
| 97           | 97-1         | purple                      | <i>E. faecium</i>                       | yes                 | +              |                | +           |             |                                          |                                          | 97-1         |
|              | 97-2         | navy blue                   | <i>E. faecium</i>                       | yes                 | +              |                | +           |             |                                          |                                          | 97-2         |
| 100          | 100-1        | navy blue                   | <i>E. faecium</i>                       | yes                 | +              |                | +           |             |                                          |                                          | 100-1        |
|              | 100-2        | light blue                  | <i>E. faecalis</i>                      | no                  | +              |                | +           |             |                                          |                                          | 100-2        |
| 103          | 103          | navy blue                   | <i>E. faecium</i>                       | yes                 | +              |                | +           |             |                                          |                                          | 103          |
| 107          | 107-1        | navy blue                   | <i>E. faecium</i>                       | yes                 | +              |                | +           |             |                                          |                                          | 107-1        |
| 111          | 111          | navy blue                   | <i>E. faecium</i>                       | yes                 | +              |                | +           |             |                                          |                                          | 111          |
| 113          | 113          | navy blue                   | <i>E. faecium</i>                       | yes                 | +              |                | +           |             |                                          |                                          | 113          |
| 121          | 121          | navy blue                   | <i>E. faecium</i>                       | yes                 | +              |                | +           |             |                                          |                                          | 121          |
| 124          | 124-1        | navy blue                   | <i>E. faecium</i>                       | yes                 | +              |                | +           |             |                                          |                                          | 124-1        |
|              | 124-2        | purple                      | <i>E. faecium</i>                       | yes                 | +              |                | +           |             |                                          |                                          | 124-2        |
|              | 124-3        | light blue                  | <i>E. faecalis</i>                      | no                  | +              |                | +           |             |                                          |                                          | 124-3        |
|              | 131-2        | purple                      | <i>E. faecium</i>                       | yes                 | +              |                | +           |             |                                          |                                          | 131-2        |
| 136          | 136-1        | navy blue                   | <i>E. faecium</i>                       | yes                 | +              |                | +           |             |                                          |                                          | 136-1        |
| 137          | 137          | navy blue                   | <i>E. faecium</i>                       | yes                 | +              |                | +           |             |                                          |                                          | 137          |
| 144          | 144-1        | navy blue                   | <i>E. faecium</i>                       | yes                 | +              |                | +           |             |                                          |                                          | 144-1        |
| 148          | 148          | navy blue                   | <i>E. faecium</i>                       | yes                 | +              |                | +           |             |                                          |                                          | 148          |
| 154          | 154-1        | navy blue                   | <i>E. faecium</i>                       | yes                 | +              |                | +           |             |                                          |                                          | 154-1        |
| 155          | 155          | navy blue                   | <i>E. faecium</i>                       | yes                 | +              |                | +           |             |                                          |                                          | 155          |
| 158          | 158          | navy blue                   | <i>E. faecium</i>                       | yes                 | +              |                | +           |             |                                          |                                          | 158          |
| 160          | 160          | navy blue                   | <i>E. faecium</i>                       | yes                 | +              |                | +           |             |                                          |                                          | 160          |
| 161          | 161          | navy blue                   | <i>E. faecium</i>                       | yes                 | +              |                | +           |             |                                          |                                          | 161          |
| 162          | 162          | navy blue                   | <i>E. faecium</i>                       | yes                 | +              |                | +           |             |                                          |                                          | 162          |
| 163          | 163-1        | navy blue                   | <i>E. faecium</i>                       | yes                 | +              |                |             | No growth   | 2                                        |                                          | 163-1        |
|              | 163-2        | light blue                  | <i>E. faecalis</i>                      | no                  | +              |                |             | No growth   | 512                                      |                                          | 163-2        |

**Table S4. Data for *ddl*-confirmed *E. faecalis* strains.**

Notes:

\* For PCR analysis, an empty cell indicates a negative result for the PCR reaction.

NT indicates Not Tested. n/a indicates that the PCR reaction was not performed because the strain could not be recovered from freezer stock.

\*\* For Spectra VRE re-testing, a blank cell indicates that the experiment was not performed for that strain.

\*\*\* Two trials of broth microdilution were performed. A blank cell indicates that the experiment was not performed for that strain.

| Patient ID # | Isolate ID # | Colony Color on Spectra VRE | Predicted species based on colony color | Correct prediction? | PCR analysis*  |                |             |             | Re-test for growth on Spectra VRE agar** | Growth on BHI + 6 ug/ml Van | Vancomycin MIC by broth microdilution*** | Isolate ID # |
|--------------|--------------|-----------------------------|-----------------------------------------|---------------------|----------------|----------------|-------------|-------------|------------------------------------------|-----------------------------|------------------------------------------|--------------|
|              |              |                             |                                         |                     | <i>Efm-ddl</i> | <i>Efs-ddl</i> | <i>vanA</i> | <i>vanB</i> |                                          |                             |                                          |              |
| 2            | 2-1          | light blue                  | <i>E. faecalis</i>                      | yes                 |                | +              |             |             | No growth                                |                             |                                          | 2-1          |
|              | 2-2          | light blue                  | <i>E. faecalis</i>                      | yes                 |                | +              |             |             | No growth                                | No growth                   | 4 ug/ml                                  | 2-2          |
|              | 2-3          | navy blue                   | <i>E. faecium</i>                       | no                  |                | +              |             |             | No growth                                | No growth                   |                                          | 2-3          |
|              | 43-2         | light blue                  | <i>E. faecalis</i>                      | yes                 |                | +              |             |             | No growth                                |                             |                                          | 43-2         |
| 59           | 59           | light blue                  | <i>E. faecalis</i>                      | yes                 |                | +              | +           |             | Growth - light blue colonies             |                             | >= 512 ug/ml                             | 59           |
| 80           | 80           | light blue                  | <i>E. faecalis</i>                      | yes                 |                | +              |             |             | No growth                                |                             |                                          | 80           |
| 81           | 81           | light blue                  | <i>E. faecalis</i>                      | yes                 |                | +              |             |             | No growth                                |                             |                                          | 81           |
| 94           | 94-1         | light blue                  | <i>E. faecalis</i>                      | yes                 |                | +              |             |             | No growth                                |                             |                                          | 94-1         |
|              | 94-2         | big light blue              | <i>E. faecalis</i>                      | yes                 |                | +              |             |             | No growth                                | No growth                   |                                          | 94-2         |
| 101          | 101-1        | large light blue            | <i>E. faecalis</i>                      | yes                 |                | +              |             |             | No growth                                |                             |                                          | 101-1        |
|              | 101-2        | light blue                  | <i>E. faecalis</i>                      | yes                 |                | +              |             |             | No growth                                | No growth                   |                                          | 101-2        |
| 106          | 106          | light blue                  | <i>E. faecalis</i>                      | yes                 |                | +              |             |             | No growth                                |                             |                                          | 106          |
|              | 107-2        | light blue                  | <i>E. faecalis</i>                      | yes                 |                | +              |             |             | 1 light blue colony                      |                             | 4 ug/ml                                  | 107-2        |
| 110          | 110          | light blue                  | <i>E. faecalis</i>                      | yes                 |                | +              |             |             | 1 light blue colony                      |                             | 2 ug/ml                                  | 110          |
| 119          | 119-1        | navy blue                   | <i>E. faecium</i>                       | no                  |                | +              |             |             | No growth                                |                             |                                          | 119-1        |
|              | 119-2        | dark blue smudge            | <i>E. faecium</i>                       | no                  |                | +              |             |             | No growth                                | No growth                   |                                          | 119-2        |
| 122          | 122-1        | navy blue                   | <i>E. faecium</i>                       | no                  |                | +              | +           |             | Growth - navy blue colonies              | Growth                      |                                          | 122-1        |
|              | 122-2        | light blue                  | <i>E. faecalis</i>                      | yes                 |                | +              | +           |             | Growth - light blue colonies             |                             |                                          | 122-2        |
| 125          | 125-1        | light blue                  | <i>E. faecalis</i>                      | yes                 |                | +              |             |             | No growth                                |                             |                                          | 125-1        |
|              | 125-2        | small light blue            | <i>E. faecalis</i>                      | yes                 |                | +              |             |             | No growth                                | No growth                   | 2 ug/ml                                  | 125-2        |
| 127          | 127-1        | light blue                  | <i>E. faecalis</i>                      | yes                 |                | +              |             |             | No growth                                |                             |                                          | 127-1        |
|              | 127-2        | large light blue            | <i>E. faecalis</i>                      | yes                 |                | +              |             |             | No growth                                | No growth                   |                                          | 127-2        |
| 131          | 131-1        | light blue                  | <i>E. faecalis</i>                      | yes                 |                | +              | +           |             | Growth - light blue colonies             |                             |                                          | 131-1        |
| 132          | 132          | navy blue                   | <i>E. faecium</i>                       | no                  |                | +              |             |             | No growth                                |                             | 2 ug/ml                                  | 132          |
| 133          | 133-1        | navy blue                   | <i>E. faecium</i>                       | no                  |                | +              |             |             | No growth                                |                             |                                          | 133-1        |
|              | 141-2        | navy blue                   | <i>E. faecium</i>                       | no                  |                | +              | +           |             | Growth - light blue colonies             |                             |                                          | 141-2        |
| 142          | 142-1        | light blue                  | <i>E. faecalis</i>                      | yes                 |                | +              |             |             | No growth                                |                             |                                          | 142-1        |
|              | 142-2        | light blue (small)          | <i>E. faecalis</i>                      | yes                 |                | +              |             |             | No growth                                | No growth                   |                                          | 142-2        |
| 143          | 143-1        | light blue                  | <i>E. faecalis</i>                      | yes                 |                | +              |             |             | No growth                                |                             |                                          | 143-1        |
|              | 143-2        | small light blue            | <i>E. faecalis</i>                      | yes                 |                | +              |             |             | No growth                                | No growth                   |                                          | 143-2        |
| 152          | 152          | light blue                  | <i>E. faecalis</i>                      | yes                 |                | +              |             |             | No growth                                |                             |                                          | 152          |
| 153          | 153-1        | light blue                  | <i>E. faecalis</i>                      | yes                 |                | +              |             |             | No growth                                |                             |                                          | 153-1        |

**Table S5. Data for species recovered other than *E. faecalis* or *E. faecium* .**

Notes:

\* For PCR analysis, an empty cell indicates a negative result for the PCR reaction.

NT indicates Not Tested. n/a indicates that the PCR reaction was not performed because the strain could not be recovered from freezer stock.

\*\* For Spectra VRE re-testing, a blank cell indicates that the experiment was not performed for that strain.

\*\*\* Two trials of broth microdilution were performed. A blank cell indicates that the experiment was not performed for that strain.

| Patient ID # | Isolate ID # | Colony Color on Spectra VRE | Predicted species based on colony color | Correct prediction?                                       | PCR analysis*  |                |             |             | Re-test for growth on Spectra VRE agar** | Growth on BHI + 6 ug/ml Van | Vancomycin MIC by broth microdilution*** | Isolate ID # |
|--------------|--------------|-----------------------------|-----------------------------------------|-----------------------------------------------------------|----------------|----------------|-------------|-------------|------------------------------------------|-----------------------------|------------------------------------------|--------------|
|              |              |                             |                                         |                                                           | <i>Efm-ddl</i> | <i>Efs-ddl</i> | <i>vanA</i> | <i>vanB</i> |                                          |                             |                                          |              |
|              | 133-2        | white                       | --                                      | no - <i>Staphylococcus epidermidis</i> by 16S rRNA        |                |                | NT          | NT          | No growth                                | No growth                   |                                          | 133-2        |
| 146          | 146          | light blue                  | <i>E. faecalis</i>                      | no - <i>E. raffinosus</i> or <i>E. gilvus</i> by 16S rRNA |                |                | +           |             | Growth - light purple colonies           |                             | 128 ug/ml                                | 146          |
